# Supplementary material for: Highly sensitive and selective detection of PCB 77 using an aptamer-catalytic hairpin assembly in an aquatic environment
Source: Royal Society of Chemistry journal article supplement (doi:10.1039/d0ra10285g), 2021-01-01
Supplement: d0ra10285g1.pdf [file d0ra10285g1.pdf]

## Supporting Information

### **Highly Sensitive and Selective Detection of PCB 77 Using an Aptamer-Catalytic Hairpin Assembly in an Aquatic Environment**

Lin Yuan<sup>1</sup>, Qiang Fu<sup>1</sup>, Maojuan Zhou<sup>1</sup>, Yunqian Ma<sup>1</sup>, Lihua Zang<sup>1</sup>, Yingjian Qin<sup>1</sup>,  
Dandan Ji<sup>1,\*</sup>, Fengshan Zhang<sup>2,\*</sup>

<sup>1</sup> *College of Environmental Science and Engineering, Qilu University of Technology (Shandong Academy of Science), Jinan, Shandong, P. R. China 250353.*

<sup>2</sup> *Huatai Group, Guangrao, Shandong, P. R. China 257335.*

\* Corresponding Author.

Tel: +86 053189631680;

*E-mail address:* [jdd@qlu.edu.cn](mailto:jdd@qlu.edu.cn); [htjszx@163.com](mailto:htjszx@163.com).

## 1. Gel Electrophoresis Assay

Gel electrophoresis analysis was performed using 12% (w/w) denatured polyacrylamide gel electrophoresis (PAGE) gels in  $1 \times$  TAE buffer. The electrophoresis was then performed at a constant potential of 250 V for 20 min with a load of 10  $\mu$ L of sample in each lane at room temperature. After electrophoresis imaged via a Bio-Rad Gel.Doc 2000 imaging system.

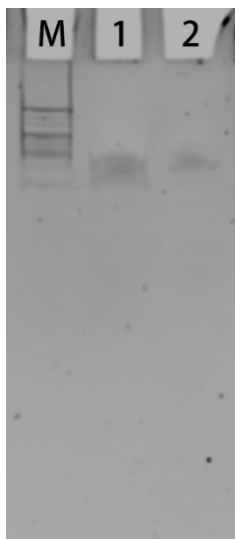

**Fig. S1** 12% denatured PAGE gel for aptamer-CHA amplification reaction. Lane M: DNA marker; Lane 1: aptamer+ H1 + H2 in buffer without PCB 77; Lane 2: aptamer+ H1 + H2 in buffer with PCB 77 (20  $\mu$ g/L).

## 2. Optimization Assay

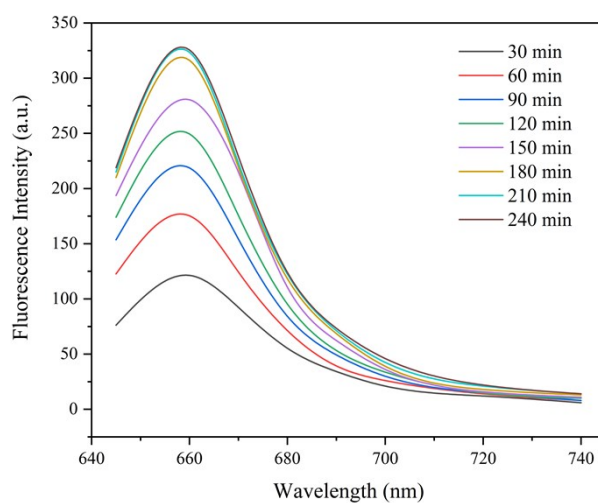

**Fig. S2** Fluorescence spectra of aptamer-CHA reaction time.

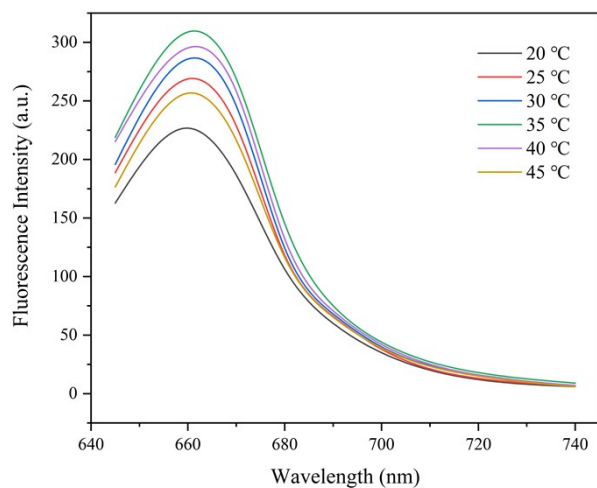

**Fig. S3** Fluorescence spectra of aptamer-CHA reaction temperature.

### 3. Selectivity of the Aptamer-CHA Assay

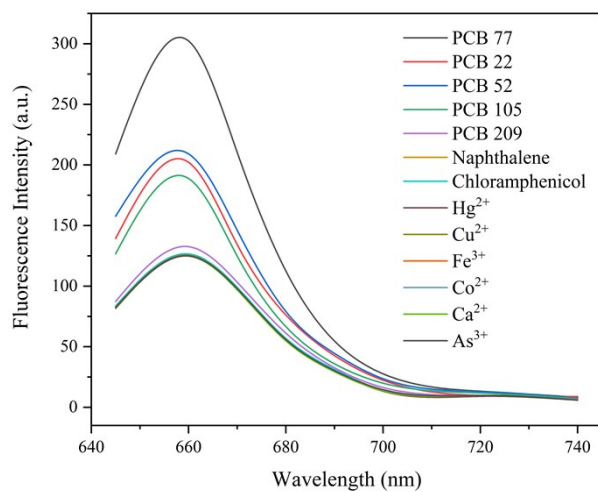

**Fig. S4** Fluorescence spectra for the selectivity of the aptamer-CHA reaction.

### 4. Reproducibility, Repeatability and Long-term Stability

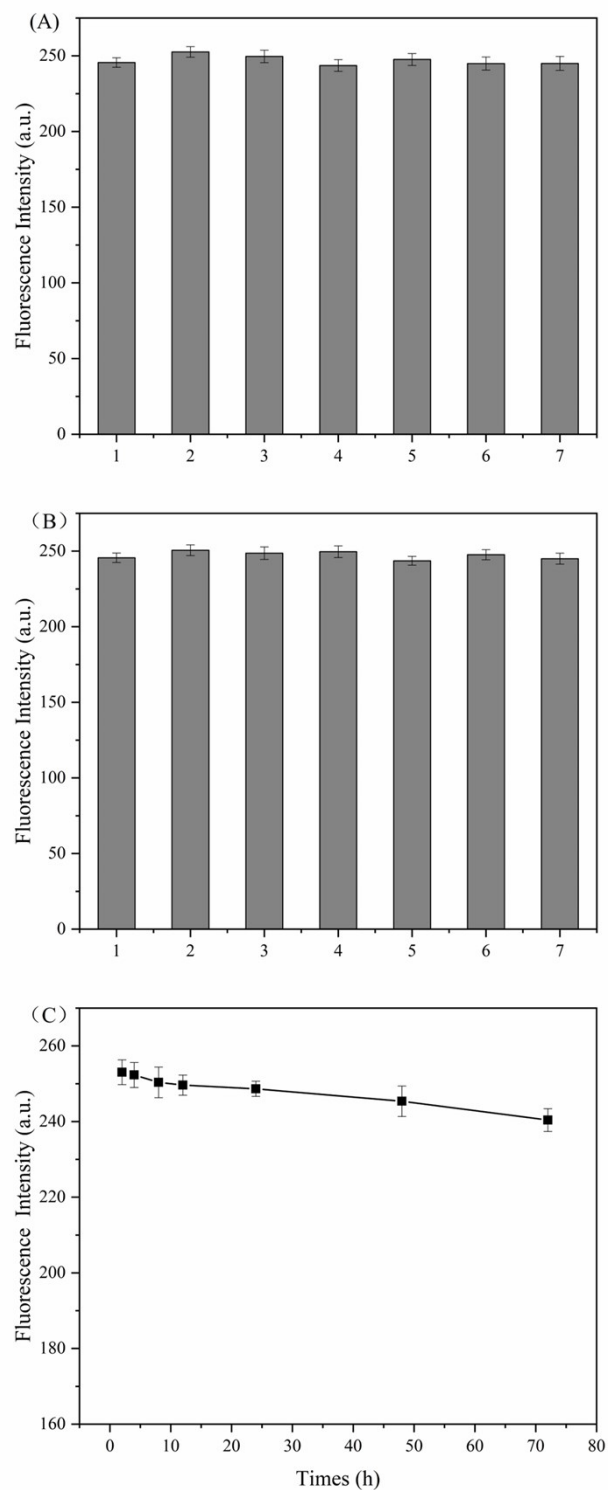

**Fig. S5** Reproducibility, repeatability and long-term stability of the aptamer-CHA reaction. The dose of PCB 77 was 20  $\mu\text{g/L}$ . (A) Seven aptamer-CHA reaction prepared under the same conditions to detect the same PCB 77. (B) Seven PCB 77 prepared under the same conditions were measured by the same aptamer-CHA reaction. (C) The same aptamer-CHA reaction was measured PCB 77 three times at different times (2, 4, 8, 12, 24, 36, 72 h).

## 5. Water Sample Analysis

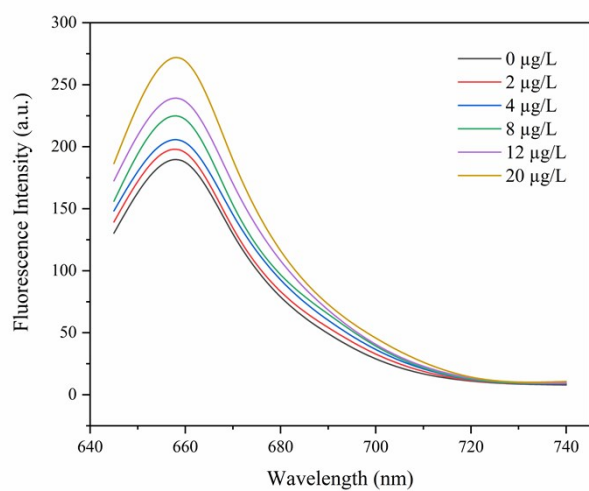

**Fig. S6** Fluorescence spectra for the water sample analysis.

**Table S1.** Detection data of PCB 77 in an actual water sample.

| Added amount of PCB 77 ( $\mu\text{g/L}$ ) | Average $\pm$ SD ( $\mu\text{g/L}$ ) | Recovery (%) | RSD (%) |
|--------------------------------------------|--------------------------------------|--------------|---------|
| 0                                          | $2.14 \pm 0.08$                      | 70.00        | 3.90    |
| 2                                          | $4.12 \pm 0.16$                      | 81.52        | 3.95    |
| 4                                          | $6.30 \pm 0.19$                      | 89.32        | 3.05    |
| 8                                          | $11.34 \pm 0.57$                     | 102.57       | 5.02    |
| 12                                         | $15.30 \pm 0.64$                     | 101.62       | 4.21    |
| 20                                         | $24.09 \pm 1.24$                     | 104.49       | 5.14    |
